# Supplementary material
Source: PubMed Central journal article supplement (PMC10119809)
Supplement: NIHMS1875730-supplement-321228_Major_Resources_Table.pdf [file NIHMS1875730-supplement-321228_Major_Resources_Table.pdf]

## Major Resources Table

In order to allow validation and replication of experiments, all essential research materials listed in the Methods should be included in the Major Resources Table below. Authors are encouraged to use public repositories for protocols, data, code, and other materials and provide persistent identifiers and/or links to repositories when available. Authors may add or delete rows as needed.

### Animals (in vivo studies)

| Species | Vendor or Source                                                        | Background Strain | Sex |
|---------|-------------------------------------------------------------------------|-------------------|-----|
| Mouse   | Jaffe Lab Breeding colony, sourced originally from Jackson Laboratories | C57Bl/6           | F   |

### Genetically Modified Animals

|                        | Species | Vendor or Source          | Background Strain | Other Information    |
|------------------------|---------|---------------------------|-------------------|----------------------|
| <b>Parent - Male</b>   | Mouse   | Jaffe Lab breeding colony | C57Bl/6           | MRL2 fl/fl, SMA Cre+ |
| <b>Parent - Female</b> | Mouse   | Jaffe Lab breeding colony | C57Bl/6           | MRL2 fl/fl, no cre   |

### Antibodies

| Target antigen                                   | Vendor or Source                     | Catalog #   | Working concentration |
|--------------------------------------------------|--------------------------------------|-------------|-----------------------|
| Mouse monoclonal anti-Mineralocorticoid receptor | Developmental Studies Hybridoma Bank | rMR1-18 1D5 | 1:500                 |
| Anti mouse HRP secondary                         | Cell Signaling                       | #7076       | 1:1000                |
| Anti rabbit HRP secondary                        | Cell Signaling                       | #7074       | 1:1000                |
| Rabbit anti VEGFR1                               | Cell Signaling                       | #64094      | 1:500                 |
| Rabbit anti VEGFR2                               | Cell Signaling                       | #9698       | 1:1000                |
| Rabbit GAPDH                                     | Cell Signaling                       | #2118       | 1:2000                |

### Cultured Cells

| Name                                   | Vendor or Source                                                    | Sex (F, M, or unknown) |
|----------------------------------------|---------------------------------------------------------------------|------------------------|
| Pac1 SMC                               | From Dr. Joyce Li                                                   | unknown                |
| Human Aortic SMC                       | Primary cultures sourced from National Disease Research Interchange | Male                   |
| Human Umbilical Vein Endothelial Cells | Primary cultures sourced from National Disease Research Interchange | Male                   |
